# Supplementary material for: Modulating the immune response to SARS-CoV-2 by different nanocarriers delivering an mRNA expressing trimeric RBD of the spike protein: COVARNA Consortium
Source: PubMed Central journal article supplement (PMC10918104; doi:10.1038/s41541-024-00838-8), 2024-03-06
Supplement: 41541_2024_838_MOESM1_ESM.pdf [file 41541_2024_838_MOESM1_ESM.pdf]

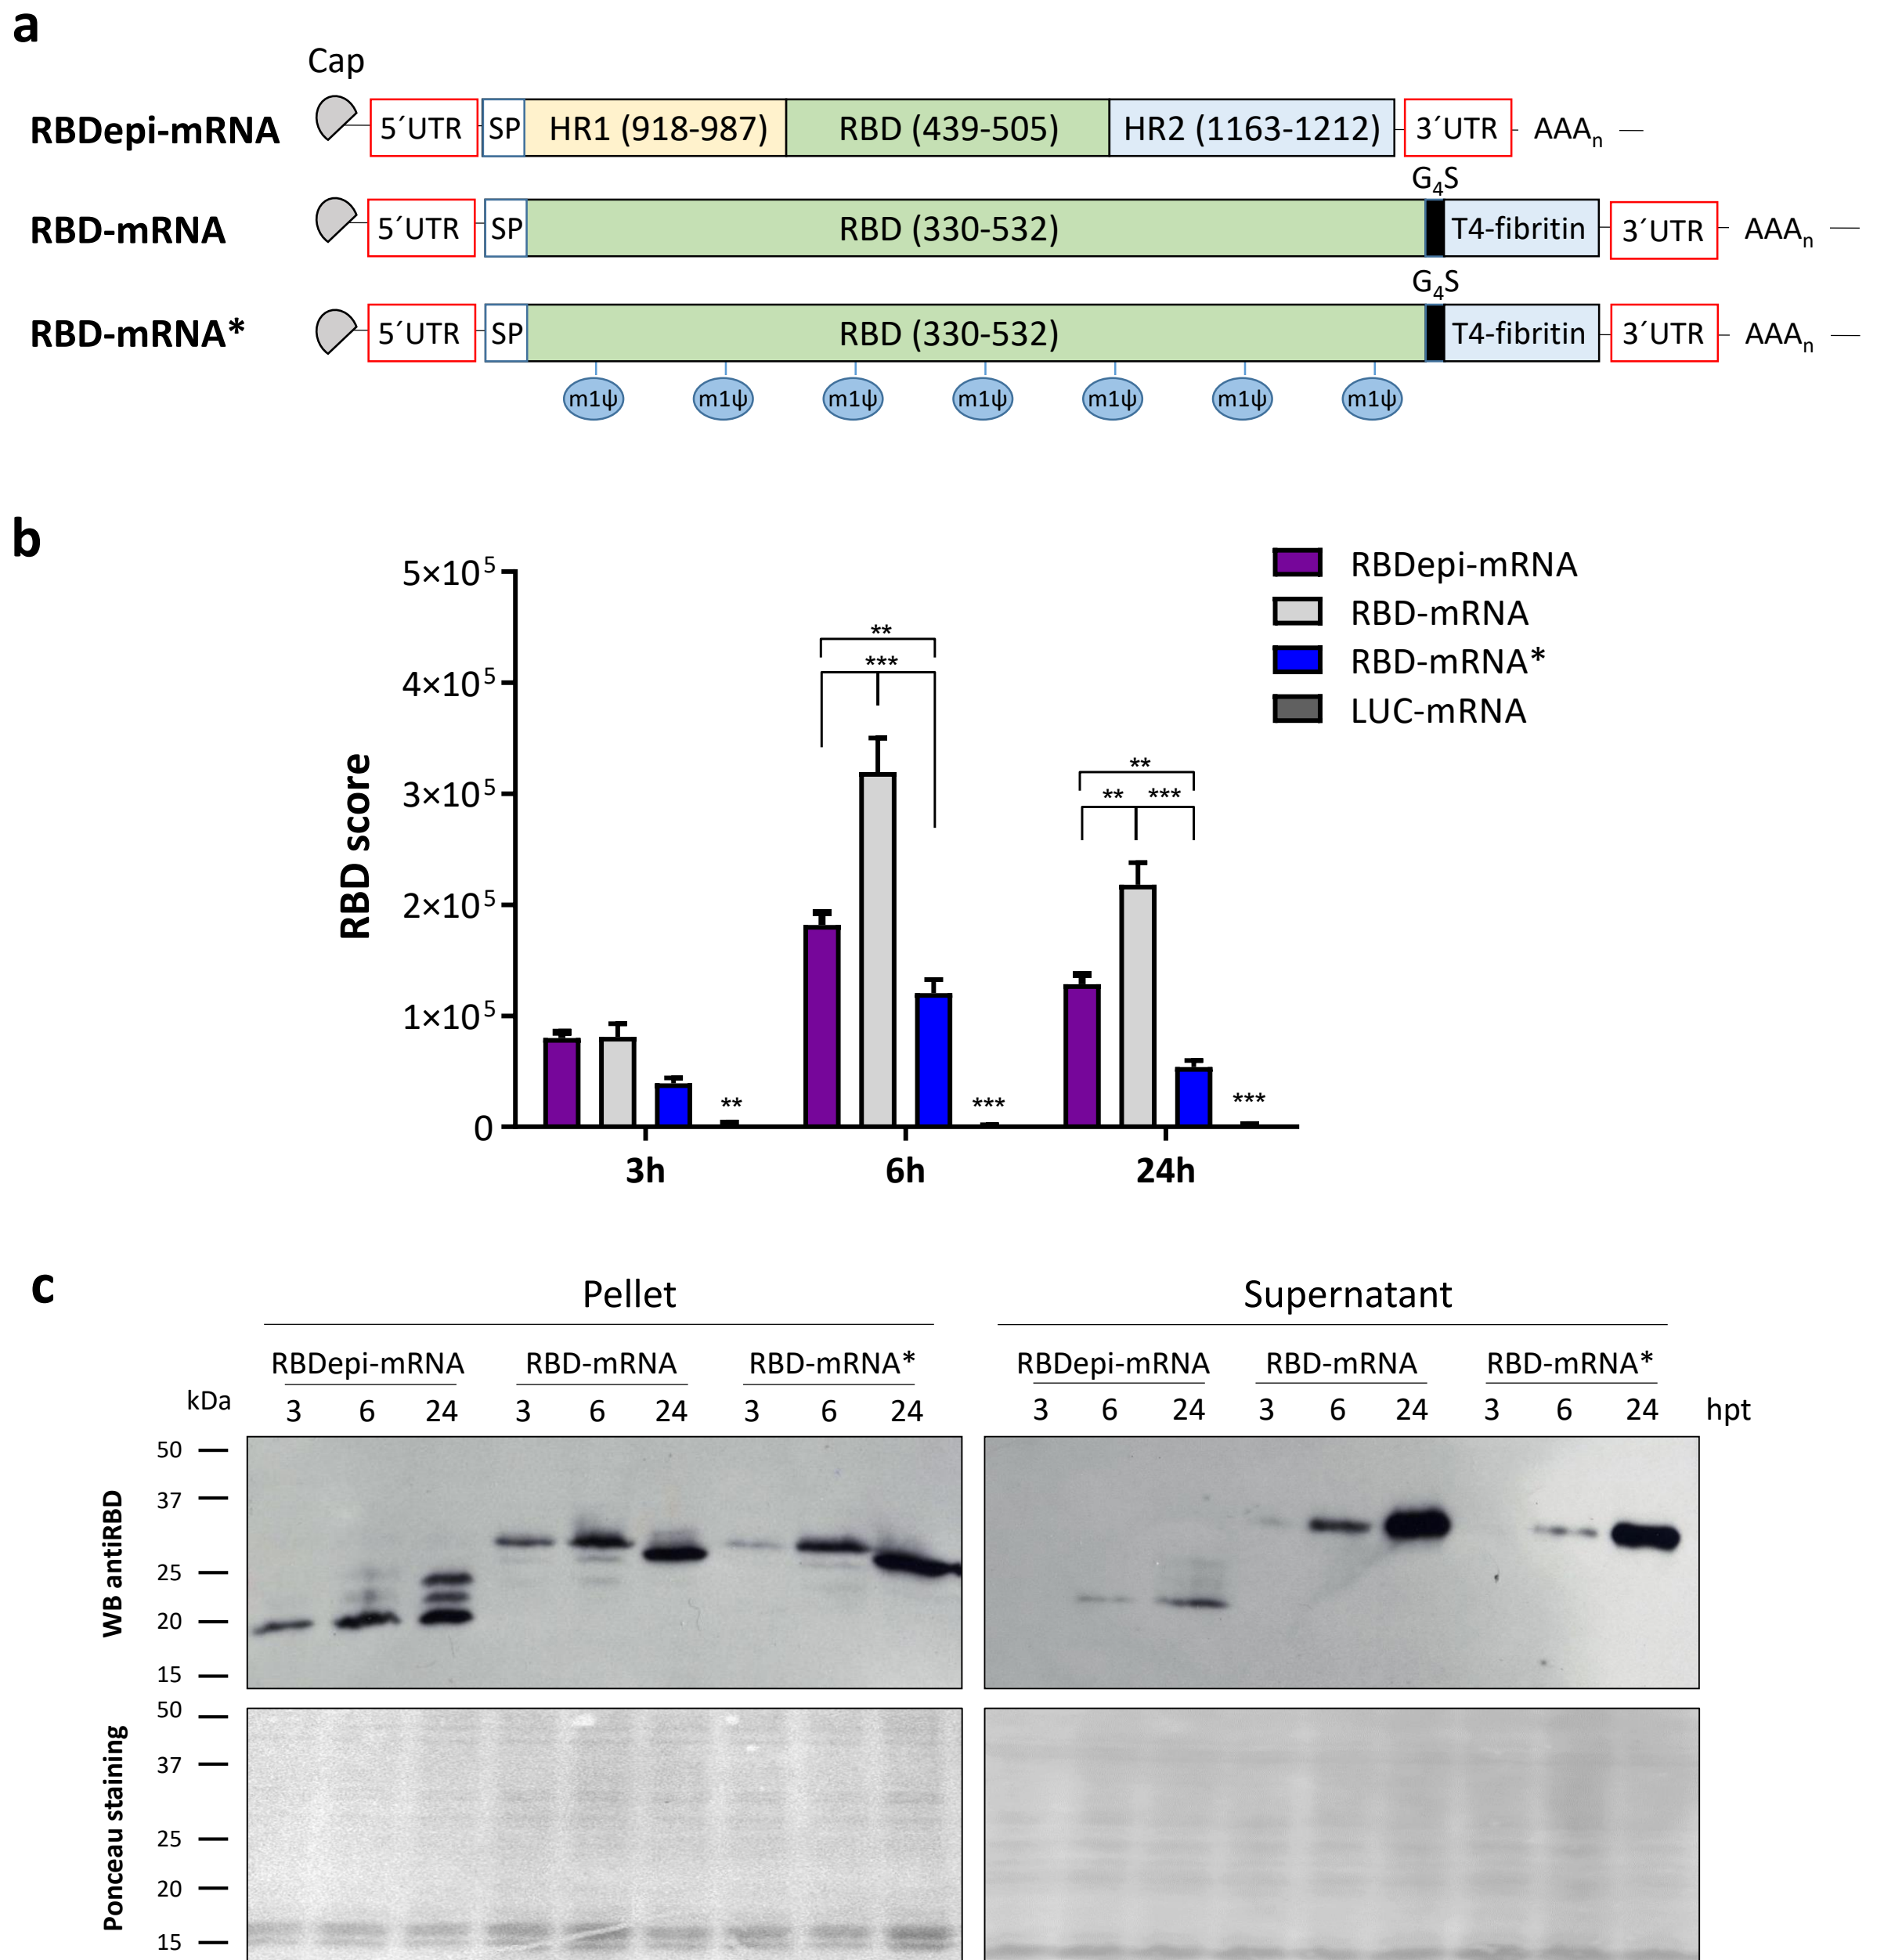

**Supplementary Figure 1. Time-course expression of SARS-CoV-2 RBD protein after transfection of 293T cells with different naked mRNAs. (A)** Scheme of the structure of the three different mRNAs expressing the full receptor binding domain (RBD: aas 330-532) of the SARS-CoV-2 spike protein (RBD-mRNA and RBD-mRNA\*) or its highly immunogenic motif (RBDepi-mRNA). **(B)** Detection of RBD expression in transfected 293T cells at 3, 6 and 24 h post-transfection (h.p.t.) by flow cytometry using a rabbit polyclonal anti-SARS-CoV-2 spike/RBD antibody (5  $\mu$ g/mL). Geometric Mean Fluorescence Intensity (gMFI) values on the “live cells” gate were used to calculate the RBD score by applying the formula: No. RBD<sup>+</sup> cells  $\times$  gMFI/No. live cells. Cells transfected with naked LUC-mRNA were used as negative control. Mean with standard error of the mean (SEM) is represented. A multiple *t* test was performed. \*\*  $p < 0.005$ ; \*\*\*  $p < 0.001$ . **(C)** Kinetics of RBD expression in cellular pellets and supernatants from transfected 293T cells by western-blotting using a rabbit polyclonal anti-SARS-CoV-2 spike/RBD antibody (upper panels). Ponceau staining (lower panels) was used as loading control. All blots derive from the same experiment and were processed in parallel.

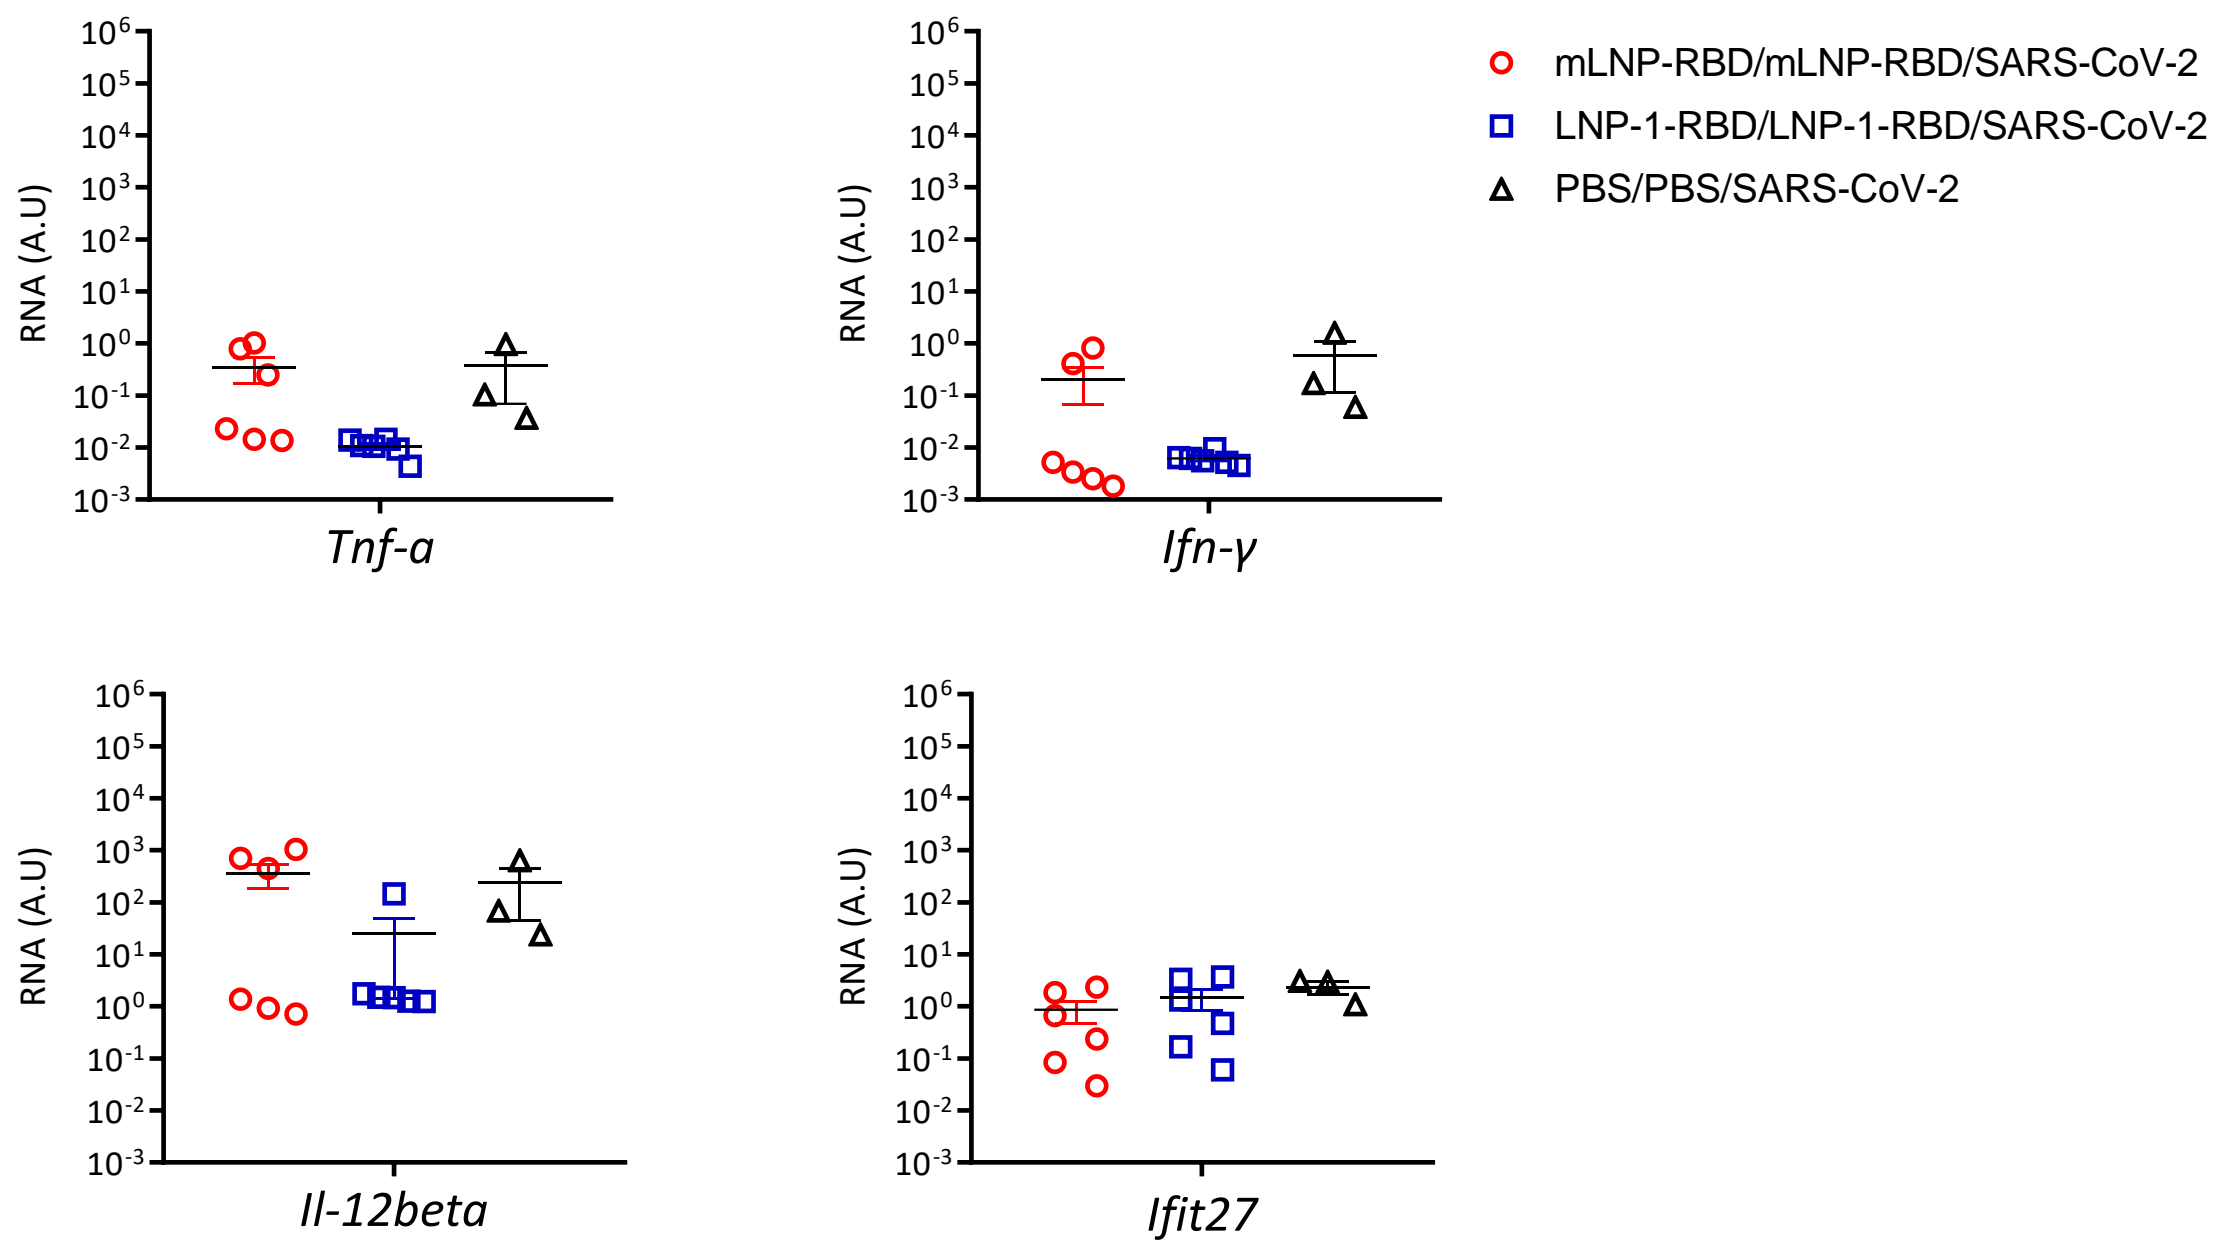

**Supplementary Figure 2.** mLNP-RBD and LNP-1-RBD formulations do not change significantly *Tnf-α*, *Ifn-γ*, *Il-12beta* and *Ifit27* gene expression profiles in lungs from vaccinated and challenged transgenic K18-hACE2 mice. Proinflammatory cytokines and chemokines were detected by RT-qPCR in lungs from individual mice at 14 days (groups 1 and 2) or 7 days (group 3) after SARS-CoV-2 challenge. Mean RNA levels (in A.U.) with standard error of the mean (SEM) from duplicates of each lung sample is represented; relative values are referred to uninfected mice (group 4). An ordinary one-way ANOVA of transformed data followed by Tukey's multiple comparison test was performed. ns > 0.05.

## Supplementary Table 1

| <b>Target</b>         | <b>Taqman probes</b>                                                                                           |
|-----------------------|----------------------------------------------------------------------------------------------------------------|
| <i>Il-24</i>          | Mm00474102_m1                                                                                                  |
| <i>Ccl2</i>           | Mm00441242_m1                                                                                                  |
| <i>Ip-10 (Cxcl10)</i> | Mm00445235_m1                                                                                                  |
| <i>Ifn-beta1</i>      | Mm00439552_g1                                                                                                  |
| <i>Cxcl5</i>          | Mm00436451_g1                                                                                                  |
| <i>Fcgr4</i>          | Mm00519988_m1                                                                                                  |
| <i>Ccl12</i>          | Mm01617100_m1                                                                                                  |
| <i>Timp-1</i>         | Mm01341361_m1                                                                                                  |
| <i>Il-10</i>          | Mm00439616_m1                                                                                                  |
| <i>Il-6</i>           | Mm00446190_m1                                                                                                  |
| <i>Ifn-γ</i>          | Mm01168134_m1                                                                                                  |
| <i>Tnf-α</i>          | Mm00443258_m1                                                                                                  |
| <i>Il-12beta</i>      | Mm01288989_m1                                                                                                  |
| <i>Ifit27</i>         | Mm00508912_m1                                                                                                  |
|                       | <b>Primers/probe sets</b>                                                                                      |
| <i>28s</i>            | PROBE[JOE] 5' TAGTAGCTGGTTCCTCCGAAGTTTCCT 3'<br>Rev 5' CGAGAGCAGCTATCCT 3'<br>Fwd 5' GGCGAAAGACTAATCGAACCAT 3' |
|                       | <b>Kit</b>                                                                                                     |
| <i>RdRp</i>           | NZYTEch SARS-CoV-2 One-Step RT-PCR Kit II,                                                                     |
| <i>N</i>              | RdRp and N genes, IVD (MD04871)                                                                                |

**Supplementary Table 1.** Taqman probes used for the detection of proinflammatory cytokines and chemokines. Primers/probe sets used for the detection of 28S (housekeeping gene). Detection kit used for the quantification of the total SARS-CoV-2 genomic (*RdRp*) and subgenomic (*N*) RNA copy numbers.

Uncropped blots of Figure 1b

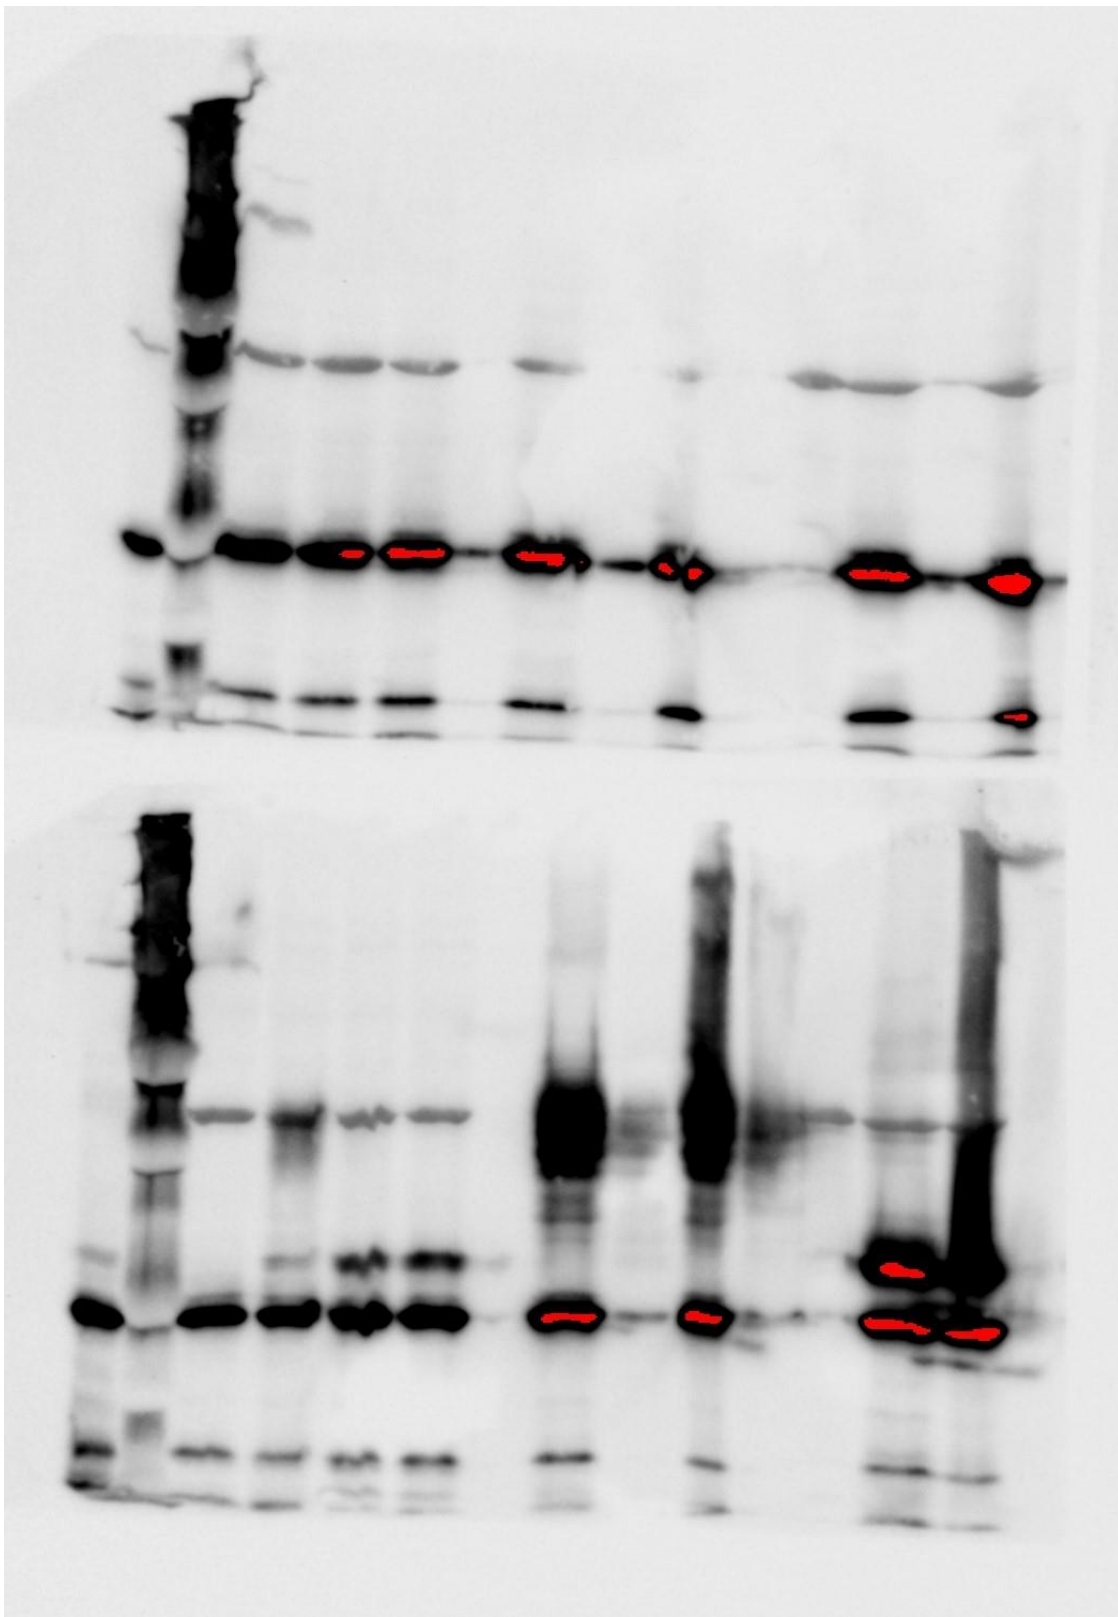

RBD staining

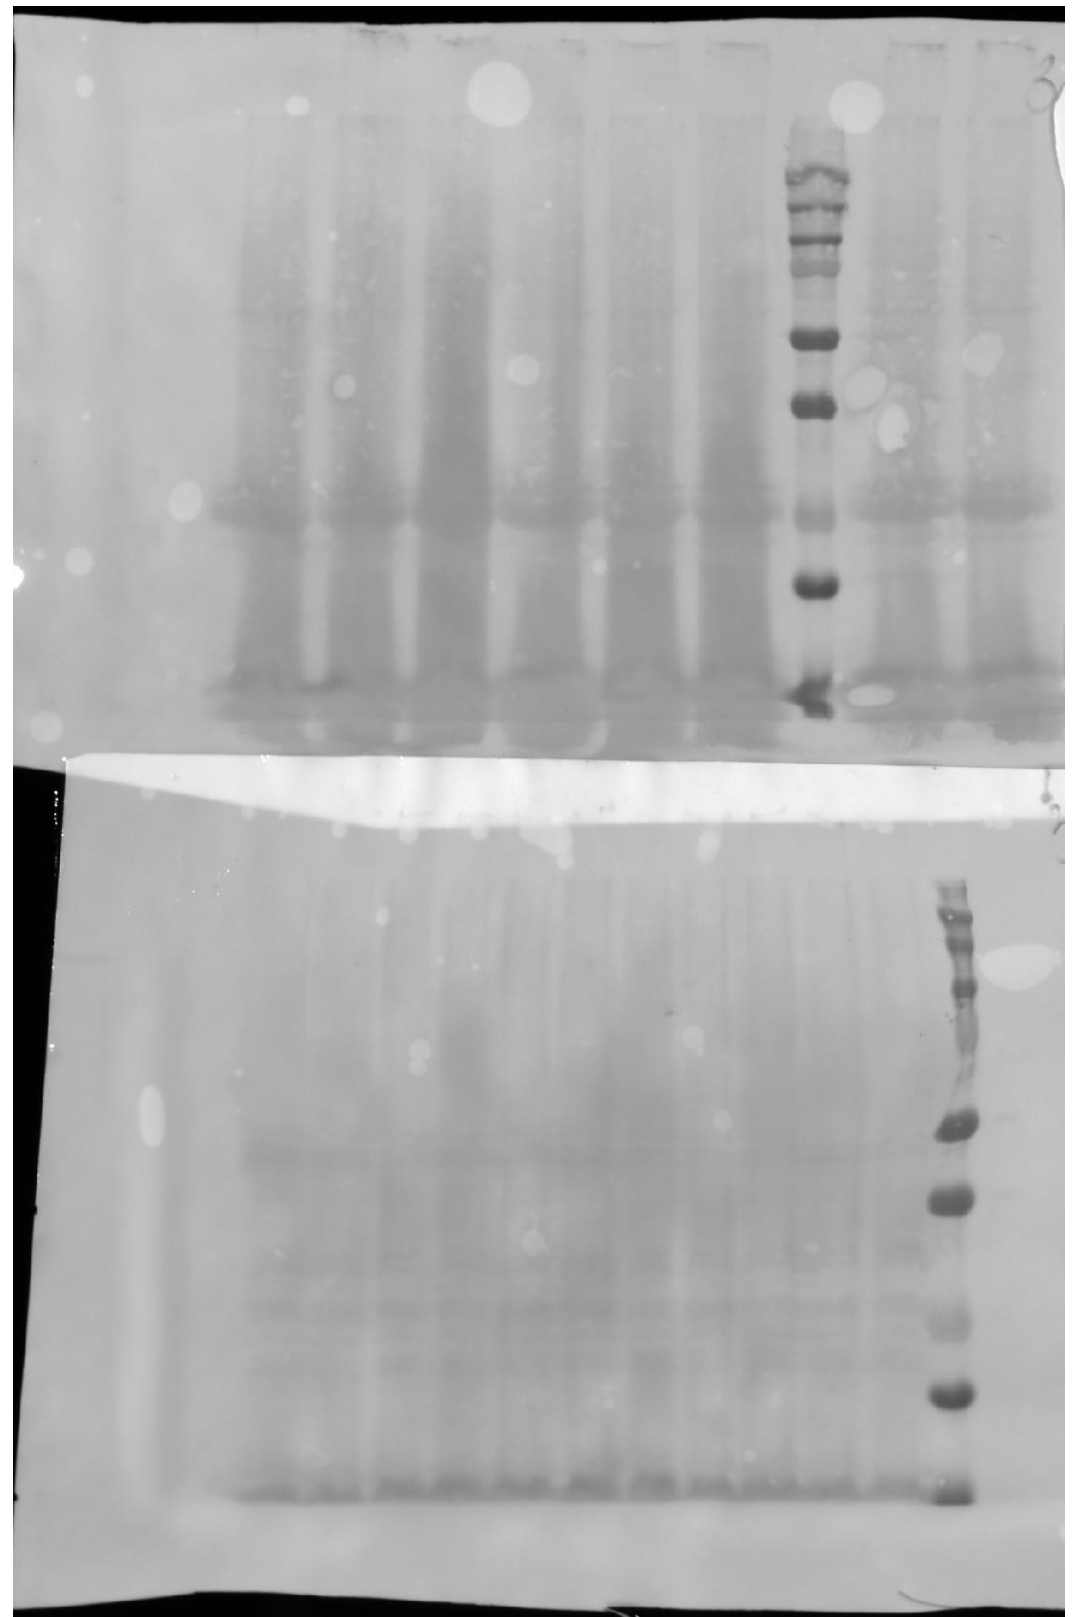

Ponceau staining

Uncropped blots of Supplementary Figure 1c

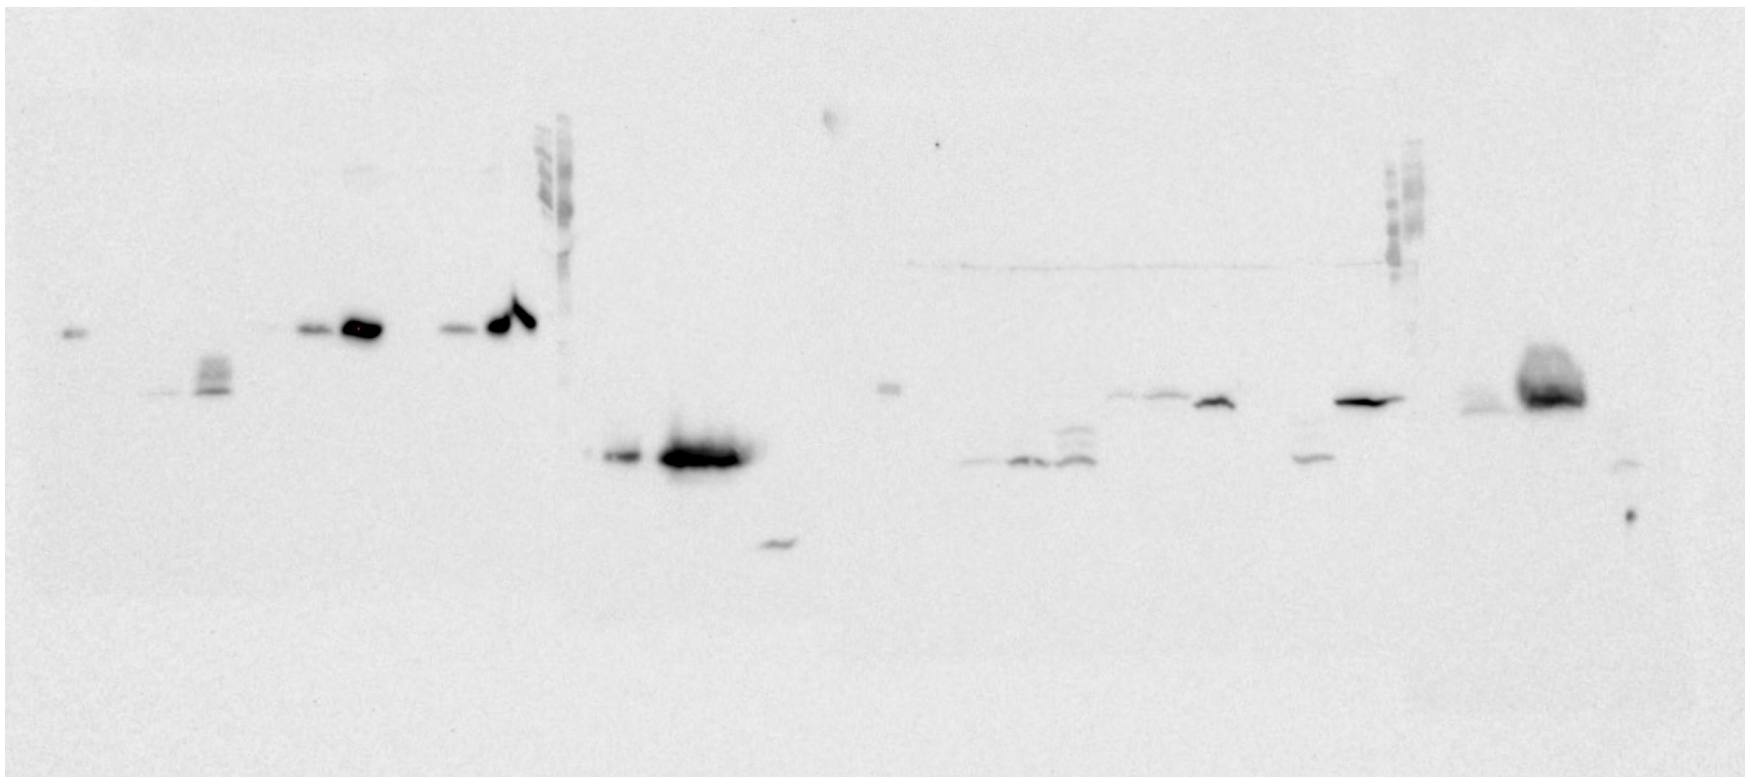

RBD staining

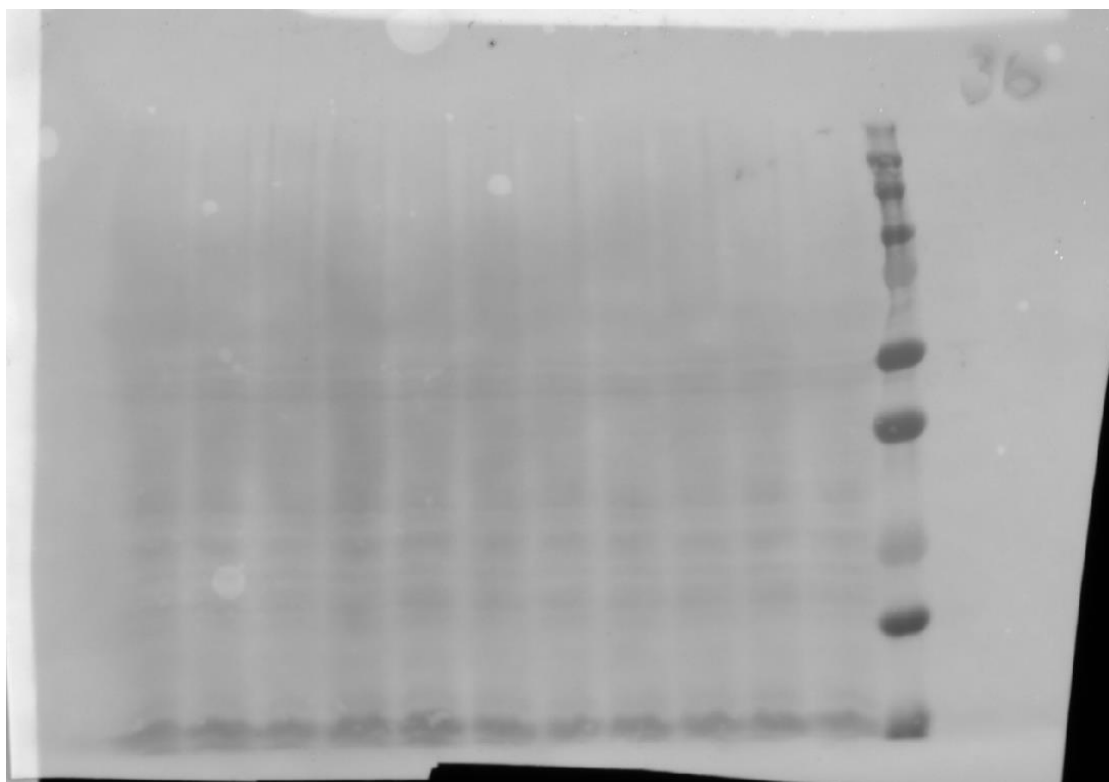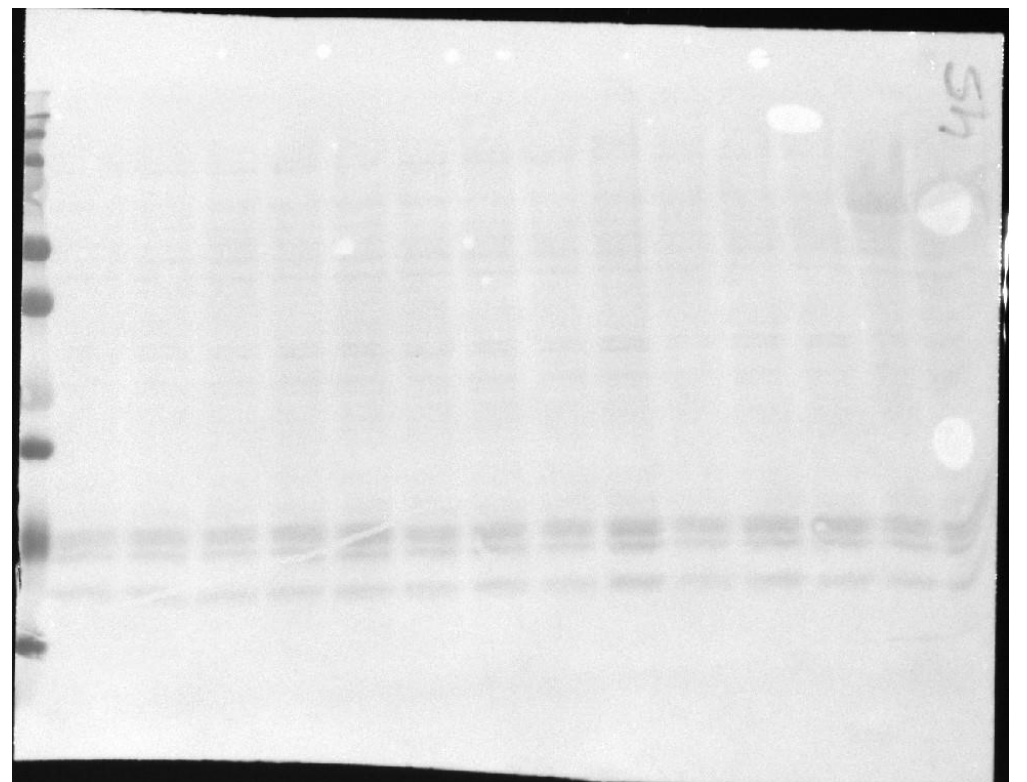

Ponceau staining
